# Supplementary material for: Role of Homer Proteins in the Maintenance of Sleep-Wake States
Source: PLOS journal article supplement (doi:10.1371/journal.pone.0035174), 2012-04-20
Supplement: S2 (10.1371/journal.pone.0035174.s002) [file journal.pone.0035174.s002]

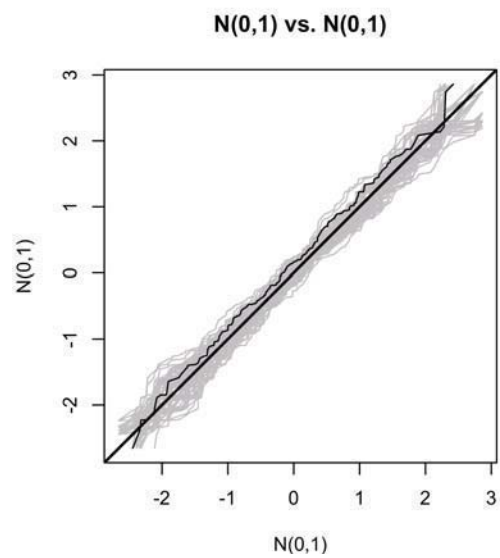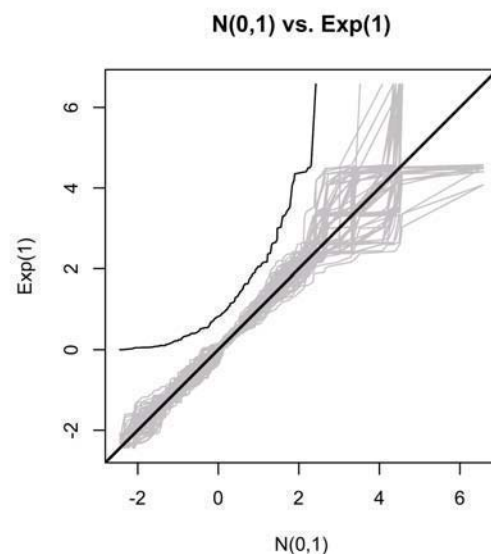

FIGURE S2
